# Supplementary material for: Cryptic Diversity in Indo-Australian Rainbowfishes Revealed by DNA Barcoding: Implications for Conservation in a Biodiversity Hotspot Candidate
Source: PLoS One. 2012 Jul 19;7(7):e40627. doi: 10.1371/journal.pone.0040627 (PMC3400673; doi:10.1371/journal.pone.0040627)
Supplement: Table S1 — Details of species and specimens. Barcode of Life Database (BOLD) specimen numbers given, along with GenBank accession numbers, geographic locality and voucher details. Assignation of each species and specimens to one of the four major clades according to the neighbour-joining tree (Fig. S1) are indicated here. (XLS) [file pone.0040627.s002.xls]

## Sheet: Feuil1
Family	Species	Geographic locality	Voucher	BOLD	Genbank
Melanotaeniidae	Chilatherina alleni	Indonesia:Papua:Legata	IRD:Icht:38 B	BIFA243-11
Melanotaeniidae	Chilatherina alleni	Indonesia:Papua:Wapoga	IRD:Icht:1282	BIFA242-11
Melanotaeniidae	Chilatherina alleni	Indonesia:Papua:Wapoga	IRD:Icht:1281	BIFA241-11
Melanotaeniidae	Chilatherina alleni	Indonesia:Papua:Wapoga	IRD:Icht:1243	BIFA240-11
Melanotaeniidae	Chilatherina alleni	Indonesia:Papua:Wapoga	IRD:Icht:1242	BIFA239-11
Melanotaeniidae	Chilatherina alleni	Indonesia:Papua:Wapoga	IRD:Icht:1241	BIFA238-11
Melanotaeniidae	Chilatherina alleni	Indonesia:Papua:Wapoga	IRD:Icht:1240	BIFA237-11
Melanotaeniidae	Chilatherina alleni	Indonesia:Papua:Wapoga	IRD:Icht:1239	BIFA236-11
Melanotaeniidae	Chilatherina alleni	Indonesia:Papua:Wapoga	IRD:Icht:1238	BIFA235-11
Melanotaeniidae	Chilatherina bleheri	Indonesia:Papua:Lake Holmes (Danau Bira)	IRD:Icht:10A	BIFA223-11
Melanotaeniidae	Chilatherina campsi	Papua New Guinea:West Sepik:Purari	IRD:Icht:32 A	BIFA245-11
Melanotaeniidae	Chilatherina fasciata	Papua New Guinea:West Sepik:Sepik	IRD:Icht:X40B	BIFA234-11
Melanotaeniidae	Chilatherina fasciata	Indonesia:Papua:Keerom	IRD:Icht:X37B	BIFA233-11
Melanotaeniidae	Chilatherina fasciata	Indonesia:Papua:Lake Sentani	IRD:Icht:X11A	BIFA232-11
Melanotaeniidae	Chilatherina fasciata	Papua New Guinea:East Sepik:Pagai	IRD:Icht:X37A	BIFA231-11
Melanotaeniidae	Chilatherina pricei	Indonesia:Papua:Randowaya	IRD:Icht:1291	BIFA222-11
Melanotaeniidae	Chilatherina pricei	Indonesia:Papua:Randowaya	IRD:Icht:1290	BIFA221-11
Melanotaeniidae	Chilatherina pricei	Indonesia:Papua:Randowaya	IRD:Icht:1289	BIFA220-11
Melanotaeniidae	Chilatherina pricei	Indonesia:Papua:Randowaya	IRD:Icht:1288	BIFA219-11
Melanotaeniidae	Chilatherina pricei	Indonesia:Papua:Randowaya	IRD:Icht:1287	BIFA218-11
Melanotaeniidae	Chilatherina pricei	Indonesia:Papua:Randowaya	IRD:Icht:1286	BIFA217-11
Melanotaeniidae	Chilatherina sp.	Indonesia:Papua:Kabuwena	IRD:Icht:1298	BIFA229-11
Melanotaeniidae	Chilatherina sp.	Indonesia:Papua:Kabuwena	IRD:Icht:1297	BIFA228-11
Melanotaeniidae	Chilatherina sp.	Indonesia:Papua:Kabuwena	IRD:Icht:1296	BIFA227-11
Melanotaeniidae	Chilatherina sp.	Indonesia:Papua:Kabuwena	IRD:Icht:1295	BIFA226-11
Melanotaeniidae	Chilatherina sp.	Indonesia:Papua:Kabuwena	IRD:Icht:1294	BIFA225-11
Melanotaeniidae	Chilatherina sp.	Indonesia:Papua:Kabuwena	IRD:Icht:1293	BIFA224-11
Atherinidae	Craterocephalus sp.	Indonesia:Papua Barat:lake Mbuta	IRD:Icht:1303	BIFA353-11
Atherinidae	Craterocephalus sp.	Indonesia:Papua Barat:lake Mbuta	IRD:Icht:1301	BIFA352-11
Atherinidae	Craterocephalus sp.	Indonesia:Papua Barat:lake Mbuta	IRD:Icht:1302	BIFA351-11
Atherinidae	Craterocephalus sp.	Indonesia:Papua Barat:lake Mbuta	IRD:Icht:1373	BIFA350-11
Atherinidae	Craterocephalus sp.	Indonesia:Papua Barat:lake Mbuta	IRD:Icht:1377	BIFA349-11
Melanotaeniidae	Glossolepis sp.	Papua New Guinea:Northern:Unknown	IRD:Icht:19 A	BIFA247-11
Melanotaeniidae	Glossolepis dorityi	Indonesia:Papua:Lake Nenggwambu	IRD:Icht:13 A	BIFA248-11
Melanotaeniidae	Glossolepis incisus	Indonesia:Papua:Lake Sentani	IRD:Icht:GL 2	BIFA251-11
Melanotaeniidae	Glossolepis incisus	Indonesia:Papua:Lake Sentani	IRD:Icht:GL 1	BIFA250-11
Melanotaeniidae	Glossolepis kabia	Papua New Guinea::Sepik	IRD:Icht:40 A	BIFA254-11
Melanotaeniidae	Glossolepis leggetti	Indonesia:Papua:Wapoga	IRD:Icht:1278	BIFA262-11
Melanotaeniidae	Glossolepis leggetti	Indonesia:Papua:Wapoga	IRD:Icht:1274	BIFA261-11
Melanotaeniidae	Glossolepis leggetti	Indonesia:Papua:Wapoga	IRD:Icht:1276	BIFA260-11
Melanotaeniidae	Glossolepis leggetti	Indonesia:Papua:Wapoga	IRD:Icht:1279	BIFA259-11
Melanotaeniidae	Glossolepis leggetti	Indonesia:Papua:Wapoga	IRD:Icht:1273	BIFA257-11
Melanotaeniidae	Glossolepis leggetti	Indonesia:Papua:Wapoga	IRD:Icht:1275	BIFA255-11
Melanotaeniidae	Glossolepis multisquamata	Indonesia:Papua:Mamberamo	IRD:Icht:14 A	BIFA253-11
Melanotaeniidae	Glossolepis pseudoincisus	Indonesia:Papua:Lake Ifanten	IRD:Icht:18 A	BIFA249-11
Melanotaeniidae	Glossolepis wanamensis	Papua New Guinea:Morobe:Lake Wanam	IRD:Icht:12 A	BIFA252-11
Melanotaeniidae	Iriatherina werneri	Australia:Northern Territory:Cape York	IRD:Icht:15A	BIFA348-11
Melanotaeniidae	Melanotaenia pigmae	Australia:Western Australia:Kimberley	IRD:Icht:8A	BIFA267-11
Melanotaeniidae	Melanotaenia affinis	Papua New Guinea:Northern:Pagwi	IRD:Icht:1 A	BIFA246-11
Melanotaeniidae	Melanotaenia ajamaruensis	Indonesia:Papua Barat:Soroang	MNHN:Icht:327	BIFA026-11
Melanotaeniidae	Melanotaenia ajamaruensis	Indonesia:Papua Barat:Soroang	MNHN:Icht:326	BIFA025-11
Melanotaeniidae	Melanotaenia ajamaruensis	Indonesia:Papua Barat:Soroang	MNHN:Icht:325	BIFA024-11
Melanotaeniidae	Melanotaenia ajamaruensis	Indonesia:Papua Barat:Soroang	MZB:Icht:324	BIFA023-11
Melanotaeniidae	Melanotaenia ajamaruensis	Indonesia:Papua Barat:Soroang	MZB:Icht:322	BIFA022-11
Melanotaeniidae	Melanotaenia ajamaruensis	Indonesia:Papua Barat:Soroang	MZB:Icht:321	BIFA021-11
Melanotaeniidae	Melanotaenia ammeri	Indonesia:Papua Barat:Gusimawa	IRD:Icht:1524	BIFA199-11
Melanotaeniidae	Melanotaenia ammeri	Indonesia:Papua Barat:Gusimawa	IRD:Icht:1523	BIFA198-11
Melanotaeniidae	Melanotaenia ammeri	Indonesia:Papua Barat:Gusimawa	IRD:Icht:1522	BIFA197-11
Melanotaeniidae	Melanotaenia ammeri	Indonesia:Papua Barat:Gusimawa	IRD:Icht:1521	BIFA196-11
Melanotaeniidae	Melanotaenia ammeri	Indonesia:Papua Barat:Gusimawa	IRD:Icht:1520	BIFA195-11
Melanotaeniidae	Melanotaenia ammeri	Indonesia:Papua Barat:Gusimawa	IRD:Icht:1519	BIFA194-11
Melanotaeniidae	Melanotaenia ammeri	Indonesia:Papua Barat:Gusimawa	IRD:Icht:1364	BIFA193-11
Melanotaeniidae	Melanotaenia ammeri	Indonesia:Papua Barat:Lobo	IRD:Icht:1363	BIFA192-11
Melanotaeniidae	Melanotaenia ammeri	Indonesia:Papua Barat:Lobo	IRD:Icht:1362	BIFA191-11
Melanotaeniidae	Melanotaenia ammeri	Indonesia:Papua Barat:Lobo	IRD:Icht:1361	BIFA190-11
Melanotaeniidae	Melanotaenia ammeri	Indonesia:Papua Barat:Lobo	IRD:Icht:1360	BIFA189-11
Melanotaeniidae	Melanotaenia ammeri	Indonesia:Papua Barat:Lobo	IRD:Icht:1359	BIFA188-11
Melanotaeniidae	Melanotaenia ammeri	Indonesia:Papua Barat:Lobo	IRD:Icht:1358	BIFA187-11
Melanotaeniidae	Melanotaenia angfa	Indonesia:Papua Barat:Naramasa	IRD:Icht:1107	BIFA163-11
Melanotaeniidae	Melanotaenia angfa	Indonesia:Papua Barat:Naramasa	IRD:Icht:1106	BIFA162-11
Melanotaeniidae	Melanotaenia angfa	Indonesia:Papua Barat:Naramasa	IRD:Icht:1102	BIFA161-11
Melanotaeniidae	Melanotaenia angfa	Indonesia:Papua Barat:Naramasa	IRD:Icht:1101	BIFA160-11
Melanotaeniidae	Melanotaenia angfa	Indonesia:Papua Barat:Yakati	Naturalis:Icht:741	BIFA153-11
Melanotaeniidae	Melanotaenia angfa	Indonesia:Papua Barat:Yakati	MNHN:Icht:740	BIFA152-11
Melanotaeniidae	Melanotaenia angfa	Indonesia:Papua Barat:Yakati	MNHN:Icht:738	BIFA151-11
Melanotaeniidae	Melanotaenia angfa	Indonesia:Papua Barat:Yakati	MZB:Icht:734	BIFA150-11
Melanotaeniidae	Melanotaenia angfa	Indonesia:Papua Barat:Yakati	MZB:Icht:729	BIFA149-11
Melanotaeniidae	Melanotaenia angfa	Indonesia:Papua Barat:Mammeh	IRD:Icht:728	BIFA148-11
Melanotaeniidae	Melanotaenia angfa	Indonesia:Papua Barat:Mammeh	IRD:Icht:726	BIFA147-11
Melanotaeniidae	Melanotaenia angfa	Indonesia:Papua Barat:Mammeh	IRD:Icht:724	BIFA146-11
Melanotaeniidae	Melanotaenia angfa	Indonesia:Papua Barat:Mammeh	IRD:Icht:723	BIFA145-11
Melanotaeniidae	Melanotaenia angfa	Indonesia:Papua Barat:Border Bintuni-Manokwari	IRD:Icht:618	BIFA144-11
Melanotaeniidae	Melanotaenia angfa	Indonesia:Papua Barat:Border Bintuni-Manokwari	IRD:Icht:545	BIFA143-11
Melanotaeniidae	Melanotaenia angfa	Indonesia:Papua Barat:Border Bintuni-Manokwari	IRD:Icht:544	BIFA142-11
Melanotaeniidae	Melanotaenia angfa	Indonesia:Papua Barat:Border Bintuni-Manokwari	IRD:Icht:543	BIFA141-11
Melanotaeniidae	Melanotaenia angfa	Indonesia:Papua Barat:Border Bintuni-Manokwari	IRD:Icht:542	BIFA140-11
Melanotaeniidae	Melanotaenia angfa	Indonesia:Papua Barat:Border Bintuni-Manokwari	IRD:Icht:541	BIFA139-11
Melanotaeniidae	Melanotaenia angfa	Indonesia:Papua Barat:Rumberpon	IRD:Icht:707	BIFA138-11
Melanotaeniidae	Melanotaenia angfa	Indonesia:Papua Barat:Rumberpon	IRD:Icht:706	BIFA137-11
Melanotaeniidae	Melanotaenia angfa	Indonesia:Papua Barat:Rumberpon	IRD:Icht:705	BIFA136-11
Melanotaeniidae	Melanotaenia angfa	Indonesia:Papua Barat:Rumberpon	IRD:Icht:704	BIFA135-11
Melanotaeniidae	Melanotaenia angfa	Indonesia:Papua Barat:Rumberpon	IRD:Icht:702	BIFA134-11
Melanotaeniidae	Melanotaenia angfa	Indonesia:Papua Barat:Rumberpon	IRD:Icht:701	BIFA133-11
Melanotaeniidae	Melanotaenia arfakensis	Indonesia:Papua Barat:Kebar Barat	IRD:Icht:473	BIFA074-11
Melanotaeniidae	Melanotaenia arfakensis	Indonesia:Papua Barat:Kebar Barat	IRD:Icht:472	BIFA073-11
Melanotaeniidae	Melanotaenia arfakensis	Indonesia:Papua Barat:Kebar Barat	IRD:Icht:471	BIFA072-11
Melanotaeniidae	Melanotaenia arfakensis	Indonesia:Papua Barat:Kebar Barat	IRD:Icht:470	BIFA071-11
Melanotaeniidae	Melanotaenia arfakensis	Indonesia:Papua Barat:Kebar Barat	IRD:Icht:468	BIFA070-11
Melanotaeniidae	Melanotaenia arfakensis	Indonesia:Papua Barat:Kebar Barat	IRD:Icht:467	BIFA069-11
Melanotaeniidae	Melanotaenia arfakensis	Indonesia:Papua Barat:Kebar Timur	IRD:Icht:430	BIFA068-11
Melanotaeniidae	Melanotaenia arfakensis	Indonesia:Papua Barat:Kebar Timur	IRD:Icht:429	BIFA067-11
Melanotaeniidae	Melanotaenia arfakensis	Indonesia:Papua Barat:Kebar Timur	IRD:Icht:428	BIFA066-11
Melanotaeniidae	Melanotaenia arfakensis	Indonesia:Papua Barat:Kebar Timur	IRD:Icht:427	BIFA065-11
Melanotaeniidae	Melanotaenia arfakensis	Indonesia:Papua Barat:Kebar Timur	IRD:Icht:425	BIFA064-11
Melanotaeniidae	Melanotaenia arfakensis	Indonesia:Papua Barat:Kebar Timur	IRD:Icht:424	BIFA063-11
Melanotaeniidae	Melanotaenia arfakensis	Indonesia:Papua Barat:Prafi	Naturalis:Icht:495	BIFA062-11
Melanotaeniidae	Melanotaenia arfakensis	Indonesia:Papua Barat:Prafi	Naturalis:Icht:495	BIFA061-11
Melanotaeniidae	Melanotaenia arfakensis	Indonesia:Papua Barat:Prafi	MNHN:Icht:495	BIFA060-11
Melanotaeniidae	Melanotaenia arfakensis	Indonesia:Papua Barat:Prafi	MNHN:Icht:495	BIFA059-11
Melanotaeniidae	Melanotaenia arfakensis	Indonesia:Papua Barat:Prafi	MZB:Icht:495	BIFA058-11
Melanotaeniidae	Melanotaenia arfakensis	Indonesia:Papua Barat:Prafi	MZB:Icht:495	BIFA057-11
Melanotaeniidae	Melanotaenia australis	Australia:Western Australia:Pilbara	IRD:Icht:AU 3	BIFA266-11
Melanotaeniidae	Melanotaenia australis	Australia:Western Australia:Pilbara	IRD:Icht:AU 2	BIFA265-11
Melanotaeniidae	Melanotaenia australis	Australia:Western Australia:Pilbara	IRD:Icht:AU1	BIFA264-11
Melanotaeniidae	Melanotaenia batanta	Indonesia:Papua Barat:Batanta	Naturalis:Icht:912	BIFA091-11
Melanotaeniidae	Melanotaenia batanta	Indonesia:Papua Barat:Batanta	MNHN:Icht:911	BIFA090-11
Melanotaeniidae	Melanotaenia batanta	Indonesia:Papua Barat:Batanta	MNHN:Icht:910	BIFA089-11
Melanotaeniidae	Melanotaenia batanta	Indonesia:Papua Barat:Batanta	MZB:Icht:906	BIFA088-11
Melanotaeniidae	Melanotaenia batanta	Indonesia:Papua Barat:Batanta	MZB:Icht:905	BIFA087-11
Melanotaeniidae	Melanotaenia boesemani	Indonesia:Papua Barat:Uter	IRD:Icht:246	BIFA038-11
Melanotaeniidae	Melanotaenia boesemani	Indonesia:Papua Barat:Uter	MNHN:Icht:244	BIFA037-11
Melanotaeniidae	Melanotaenia boesemani	Indonesia:Papua Barat:Uter	MNHN:Icht:243	BIFA036-11
Melanotaeniidae	Melanotaenia boesemani	Indonesia:Papua Barat:Uter	MNHN:Icht:242	BIFA035-11
Melanotaeniidae	Melanotaenia boesemani	Indonesia:Papua Barat:Uter	MNHN:Icht:241	BIFA034-11
Melanotaeniidae	Melanotaenia boesemani	Indonesia:Papua Barat:Ayamaru utara	MZB:Icht:298	BIFA033-11
Melanotaeniidae	Melanotaenia boesemani	Indonesia:Papua Barat:Ayamaru utara	MZB:Icht:297	BIFA032-11
Melanotaeniidae	Melanotaenia boesemani	Indonesia:Papua Barat:Ayamaru utara	MZB:Icht:296	BIFA031-11
Melanotaeniidae	Melanotaenia boesemani	Indonesia:Papua Barat:Ayamaru utara	MZB:Icht:295	BIFA030-11
Melanotaeniidae	Melanotaenia boesemani	Indonesia:Papua Barat:Ayamaru utara	MZB:Icht:294	BIFA029-11
Melanotaeniidae	Melanotaenia boesemani	Indonesia:Papua Barat:Ayamaru utara	IRD:Icht:24A	BIFA028-11
Melanotaeniidae	Melanotaenia boesemani	Indonesia:Papua Barat:Ayamaru utara	MZB:Icht:293	BIFA027-11
Melanotaeniidae	Melanotaenia catherinae	Indonesia:Papua Barat:Waigeo	IRD:Icht:17	BIFA210-11
Melanotaeniidae	Melanotaenia catherinae	Indonesia:Papua Barat:Waigeo	IRD:Icht:16	BIFA209-11
Melanotaeniidae	Melanotaenia catherinae	Indonesia:Papua Barat:Waigeo	IRD:Icht:15	BIFA208-11
Melanotaeniidae	Melanotaenia catherinae	Indonesia:Papua Barat:Waigeo	IRD:Icht:14	BIFA207-11
Melanotaeniidae	Melanotaenia catherinae	Indonesia:Papua Barat:Waigeo	IRD:Icht:12	BIFA206-11
Melanotaeniidae	Melanotaenia catherinae	Indonesia:Papua Barat:Waigeo	IRD:Icht:10	BIFA205-11
Melanotaeniidae	Melanotaenia duboulayi	Australia:New South Wales:-	IRD:Icht:7A	BIFA277-11
Melanotaeniidae	Melanotaenia eachamensis	Australia:Queensland:Lake Eacham	IRD:Icht:27A	BIFA276-11
Melanotaeniidae	Melanotaenia fasinensis	Indonesia:Papua Barat:Ween	MNHN:Icht:SW3	BIFA011-11
Melanotaeniidae	Melanotaenia fasinensis	Indonesia:Papua Barat:Ween	MZB:Icht:351	BIFA010-11
Melanotaeniidae	Melanotaenia fasinensis	Indonesia:Papua Barat:Ween	MZB:Icht:SW2	BIFA009-11
Melanotaeniidae	Melanotaenia fasinensis	Indonesia:Papua Barat:Ween	MZB:Icht:352	BIFA008-11
Melanotaeniidae	Melanotaenia fasinensis	Indonesia:Papua Barat:Ween	MZB:Icht:SW1	BIFA007-11
Melanotaeniidae	Melanotaenia fredericki	Indonesia:Papua Barat:Sausapor	IRD:Icht:S8	BIFA114-11
Melanotaeniidae	Melanotaenia fredericki	Indonesia:Papua Barat:Sausapor	IRD:Icht:S7	BIFA113-11
Melanotaeniidae	Melanotaenia fredericki	Indonesia:Papua Barat:Sausapor	IRD:Icht:S6	BIFA112-11
Melanotaeniidae	Melanotaenia fredericki	Indonesia:Papua Barat:Sausapor	IRD:Icht:S3	BIFA111-11
Melanotaeniidae	Melanotaenia fredericki	Indonesia:Papua Barat:Sausapor	IRD:Icht:S2	BIFA110-11
Melanotaeniidae	Melanotaenia fredericki	Indonesia:Papua Barat:Sausapor	IRD:Icht:S1	BIFA109-11
Melanotaeniidae	Melanotaenia fredericki	Indonesia:Papua Barat:Sorong	Naturalis:Icht:669	BIFA108-11
Melanotaeniidae	Melanotaenia fredericki	Indonesia:Papua Barat:Sorong	Naturalis:Icht:668	BIFA107-11
Melanotaeniidae	Melanotaenia fredericki	Indonesia:Papua Barat:Sorong	MNHN:Icht:667	BIFA106-11
Melanotaeniidae	Melanotaenia fredericki	Indonesia:Papua Barat:Sorong	MNHN:Icht:666	BIFA105-11
Melanotaeniidae	Melanotaenia fredericki	Indonesia:Papua Barat:Sorong	MZB:Icht:664	BIFA104-11
Melanotaeniidae	Melanotaenia fredericki	Indonesia:Papua Barat:Sorong	MZB:Icht:663	BIFA103-11
Melanotaeniidae	Melanotaenia fredericki	Indonesia:Papua Barat:Salawati	IRD:Icht:87	BIFA102-11
Melanotaeniidae	Melanotaenia fredericki	Indonesia:Papua Barat:Salawati	IRD:Icht:86	BIFA101-11
Melanotaeniidae	Melanotaenia fredericki	Indonesia:Papua Barat:Salawati	IRD:Icht:85	BIFA100-11
Melanotaeniidae	Melanotaenia fredericki	Indonesia:Papua Barat:Salawati	IRD:Icht:84	BIFA099-11
Melanotaeniidae	Melanotaenia fredericki	Indonesia:Papua Barat:Salawati	IRD:Icht:82	BIFA098-11
Melanotaeniidae	Melanotaenia fredericki	Indonesia:Papua Barat:Salawati	IRD:Icht:81	BIFA097-11
Melanotaeniidae	Melanotaenia fredericki	Indonesia:Papua Barat:HBM	IRD:Icht:HBM 12	BIFA096-11
Melanotaeniidae	Melanotaenia fredericki	Indonesia:Papua Barat:HBM	IRD:Icht:HBM 11	BIFA095-11
Melanotaeniidae	Melanotaenia fredericki	Indonesia:Papua Barat:HBM	IRD:Icht:HBM 10	BIFA094-11
Melanotaeniidae	Melanotaenia fredericki	Indonesia:Papua Barat:HBM	IRD:Icht:SRB	BIFA093-11
Melanotaeniidae	Melanotaenia fredericki	Indonesia:Papua Barat:HBM	IRD:Icht:SRA	BIFA092-11
Melanotaeniidae	Melanotaenia goldiei	Indonesia:Papua Barat:Dusner	IRD:Icht:1133	BIFA326-11
Melanotaeniidae	Melanotaenia goldiei	Indonesia:Papua Barat:Dusner	IRD:Icht:1132	BIFA325-11
Melanotaeniidae	Melanotaenia goldiei	Indonesia:Papua Barat:Dusner	IRD:Icht:1134	BIFA324-11
Melanotaeniidae	Melanotaenia goldiei	Indonesia:Papua Barat:Dusner	IRD:Icht:1131	BIFA323-11
Melanotaeniidae	Melanotaenia goldiei	Indonesia:Papua Barat:Dusner	IRD:Icht:1136	BIFA322-11
Melanotaeniidae	Melanotaenia goldiei	Indonesia:Papua Barat:Dusner	IRD:Icht:1135	BIFA321-11
Melanotaeniidae	Melanotaenia goldiei	Indonesia:Papua Barat:Sararti	IRD:Icht:1172	BIFA320-11
Melanotaeniidae	Melanotaenia goldiei	Indonesia:Papua Barat:Sararti	IRD:Icht:1169	BIFA319-11
Melanotaeniidae	Melanotaenia goldiei	Indonesia:Papua Barat:Munuari	IRD:Icht:769	BIFA318-11
Melanotaeniidae	Melanotaenia goldiei	Indonesia:Papua Barat:Sararti	IRD:Icht:1173	BIFA317-11
Melanotaeniidae	Melanotaenia goldiei	Indonesia:Papua Barat:Munuari	IRD:Icht:767	BIFA316-11
Melanotaeniidae	Melanotaenia goldiei	Indonesia:Papua Barat:Sararti	IRD:Icht:1170	BIFA315-11
Melanotaeniidae	Melanotaenia goldiei	Indonesia:Papua Barat:Sararti	IRD:Icht:1171	BIFA314-11
Melanotaeniidae	Melanotaenia goldiei	Indonesia:Papua Barat:Munuari	IRD:Icht:771	BIFA313-11
Melanotaeniidae	Melanotaenia goldiei	Indonesia:Papua Barat:Munuari	IRD:Icht:768	BIFA312-11
Melanotaeniidae	Melanotaenia goldiei	Indonesia:Papua:Woromi	IRD:Icht:1196	BIFA311-11
Melanotaeniidae	Melanotaenia goldiei	Indonesia:Papua:Woromi	IRD:Icht:1195	BIFA310-11
Melanotaeniidae	Melanotaenia goldiei	Indonesia:Papua:Woromi	IRD:Icht:1105	BIFA309-11
Melanotaeniidae	Melanotaenia goldiei	Indonesia:Papua:Woromi	IRD:Icht:1198	BIFA308-11
Melanotaeniidae	Melanotaenia goldiei	Indonesia:Papua:Woromi	IRD:Icht:1194	BIFA307-11
Melanotaeniidae	Melanotaenia goldiei	Indonesia:Papua Barat:Sararti	IRD:Icht:1179	BIFA306-11
Melanotaeniidae	Melanotaenia goldiei	Indonesia:Papua:Bawe	IRD:Icht:1225	BIFA305-11
Melanotaeniidae	Melanotaenia goldiei	Indonesia:Papua:Woromi	IRD:Icht:1199	BIFA304-11
Melanotaeniidae	Melanotaenia goldiei	Indonesia:Papua Barat:Tanjung Boi	IRD:Icht:1424	BIFA303-11
Melanotaeniidae	Melanotaenia goldiei	Indonesia:Papua Barat:lake Mbuta	IRD:Icht:1397	BIFA302-11
Melanotaeniidae	Melanotaenia goldiei	Indonesia:Papua:Bumi	IRD:Icht:1230	BIFA301-11
Melanotaeniidae	Melanotaenia goldiei	Indonesia:Papua:Bumi	IRD:Icht:1228	BIFA300-11
Melanotaeniidae	Melanotaenia goldiei	Indonesia:Papua:Bumi	IRD:Icht:1231	BIFA299-11
Melanotaeniidae	Melanotaenia goldiei	Indonesia:Papua:Bumi	IRD:Icht:1226	BIFA298-11
Melanotaeniidae	Melanotaenia goldiei	Indonesia:Papua:Bumi	IRD:Icht:1229	BIFA297-11
Melanotaeniidae	Melanotaenia goldiei	Indonesia:Papua:Bumi	IRD:Icht:1227	BIFA296-11
Melanotaeniidae	Melanotaenia goldiei	Indonesia:Papua Barat:Tanjung Boi	IRD:Icht:1427	BIFA295-11
Melanotaeniidae	Melanotaenia goldiei	Indonesia:Papua Barat:Avona	IRD:Icht:1417	BIFA294-11
Melanotaeniidae	Melanotaenia goldiei	Indonesia:Papua Barat:lake Mbuta	IRD:Icht:1396	BIFA293-11
Melanotaeniidae	Melanotaenia goldiei	Indonesia:Papua Barat:Tanjung Boi	IRD:Icht:1426	BIFA292-11
Melanotaeniidae	Melanotaenia goldiei	Indonesia:Papua Barat:Tanjung Boi	IRD:Icht:1423	BIFA291-11
Melanotaeniidae	Melanotaenia goldiei	Indonesia:Papua Barat:Avona	IRD:Icht:1419	BIFA290-11
Melanotaeniidae	Melanotaenia goldiei	Indonesia:Papua Barat:Avona	IRD:Icht:1418	BIFA289-11
Melanotaeniidae	Melanotaenia goldiei	Indonesia:Papua Barat:Tanjung Boi	IRD:Icht:1422	BIFA288-11
Melanotaeniidae	Melanotaenia goldiei	Indonesia:Papua Barat:Tanjung Boi	IRD:Icht:1425	BIFA287-11
Melanotaeniidae	Melanotaenia goldiei	Indonesia:Papua Barat:Avona	IRD:Icht:1420	BIFA286-11
Melanotaeniidae	Melanotaenia goldiei	Indonesia:Papua Barat:lake Mbuta	IRD:Icht:1400	BIFA285-11
Melanotaeniidae	Melanotaenia goldiei	Indonesia:Papua Barat:lake Mbuta	IRD:Icht:1399	BIFA284-11
Melanotaeniidae	Melanotaenia goldiei	Indonesia:Papua Barat:lake Mbuta	IRD:Icht:1398	BIFA283-11
Melanotaeniidae	Melanotaenia goldiei	Papua New Guinea::Tapini	IRD:Icht:36A	BIFA282-11
Melanotaeniidae	Melanotaenia gracilis	Australia:Western Australia:Wyndham	IRD:Icht:35A	BIFA268-11
Melanotaeniidae	Melanotaenia herbertaxelrodi	Papua New Guinea::Southern PNG	IRD:Icht:41A	BIFA335-11
Melanotaeniidae	Melanotaenia irianjaya	Indonesia:Papua Barat:Fruata	Naturalis:Icht:838	BIFA132-11
Melanotaeniidae	Melanotaenia irianjaya	Indonesia:Papua Barat:Fruata	Naturalis:Icht:837	BIFA131-11
Melanotaeniidae	Melanotaenia irianjaya	Indonesia:Papua Barat:Fruata	MNHN:Icht:836	BIFA130-11
Melanotaeniidae	Melanotaenia irianjaya	Indonesia:Papua Barat:Fruata	MNHN:Icht:835	BIFA129-11
Melanotaeniidae	Melanotaenia irianjaya	Indonesia:Papua Barat:Fruata	MZB:Icht:834	BIFA128-11
Melanotaeniidae	Melanotaenia irianjaya	Indonesia:Papua Barat:Fruata	MZB:Icht:833	BIFA127-11
Melanotaeniidae	Melanotaenia irianjaya	Indonesia:Papua Barat:Fruata	IRD:Icht:FR6	BIFA126-11
Melanotaeniidae	Melanotaenia irianjaya	Indonesia:Papua Barat:Fruata	IRD:Icht:FR5	BIFA125-11
Melanotaeniidae	Melanotaenia irianjaya	Indonesia:Papua Barat:Fruata	IRD:Icht:FR4	BIFA124-11
Melanotaeniidae	Melanotaenia irianjaya	Indonesia:Papua Barat:Fruata	IRD:Icht:FR3	BIFA123-11
Melanotaeniidae	Melanotaenia irianjaya	Indonesia:Papua Barat:Fruata	IRD:Icht:FR2	BIFA122-11
Melanotaeniidae	Melanotaenia irianjaya	Indonesia:Papua Barat:Fruata	IRD:Icht:FR1	BIFA121-11
Melanotaeniidae	Melanotaenia kamaka	Indonesia:Papua Barat:Lake Kamaka	IRD:Icht:1335	BIFA347-11
Melanotaeniidae	Melanotaenia kamaka	Indonesia:Papua Barat:Lake Kamaka	IRD:Icht:1333	BIFA346-11
Melanotaeniidae	Melanotaenia kamaka	Indonesia:Papua Barat:Lake Kamaka	IRD:Icht:1334	BIFA343-11
Melanotaeniidae	Melanotaenia kamaka	Indonesia:Papua Barat:Lake Kamaka	IRD:Icht:1336	BIFA339-11
Melanotaeniidae	Melanotaenia lacustris	Papua New Guinea::Lake Kutubu	IRD:Icht:lacustris	BIFA331-11
Melanotaeniidae	Melanotaenia lakamora	Indonesia:Papua Barat:Lake Lakamora	IRD:Icht:X31A	BIFA342-11
Melanotaeniidae	Melanotaenia maccullochi	Australia:Queensland:Cape York	IRD:Icht:2A	BIFA270-11
Melanotaeniidae	Melanotaenia mairasi	Indonesia:Papua Barat:Kuweri	IRD:Icht:1545	BIFA216-11
Melanotaeniidae	Melanotaenia mairasi	Indonesia:Papua Barat:Kuweri	IRD:Icht:1544	BIFA215-11
Melanotaeniidae	Melanotaenia mairasi	Indonesia:Papua Barat:Kuweri	IRD:Icht:1543	BIFA214-11
Melanotaeniidae	Melanotaenia mairasi	Indonesia:Papua Barat:Kuweri	IRD:Icht:1542	BIFA213-11
Melanotaeniidae	Melanotaenia mairasi	Indonesia:Papua Barat:Kuweri	IRD:Icht:1541	BIFA212-11
Melanotaeniidae	Melanotaenia mairasi	Indonesia:Papua Barat:Kuweri	IRD:Icht:1540	BIFA211-11
Melanotaeniidae	Melanotaenia misoolensis	Indonesia:Papua Barat:Misool	Naturalis:Icht:879	BIFA080-11
Melanotaeniidae	Melanotaenia misoolensis	Indonesia:Papua Barat:Misool	Naturalis:Icht:878	BIFA079-11
Melanotaeniidae	Melanotaenia misoolensis	Indonesia:Papua Barat:Misool	MNHN:Icht:875	BIFA078-11
Melanotaeniidae	Melanotaenia misoolensis	Indonesia:Papua Barat:Misool	MNHN:Icht:874	BIFA077-11
Melanotaeniidae	Melanotaenia misoolensis	Indonesia:Papua Barat:Misool	MZB:Icht:872	BIFA076-11
Melanotaeniidae	Melanotaenia misoolensis	Indonesia:Papua Barat:Misool	MZB:Icht:871	BIFA075-11
Melanotaeniidae	Melanotaenia monticola	Papua New Guinea::Mendi Nipa	IRD:Icht:17A	BIFA281-11
Melanotaeniidae	Melanotaenia oktediensis	Papua New Guinea::Ok Tedi	IRD:Icht:39A	BIFA333-11
Melanotaeniidae	Melanotaenia papua	Papua New Guinea::Laloki	IRD:Icht:34A	BIFA269-11
Melanotaeniidae	Melanotaenia parkinsoni	Papua New Guinea:Milne Bay:Matairuka	IRD:Icht:33A	BIFA280-11
Melanotaeniidae	Melanotaenia parkinsoni	Papua New Guinea:Milne Bay:Milne bay	IRD:Icht:29A	BIFA279-11
Melanotaeniidae	Melanotaenia parva	Indonesia:Papua Barat:Kurumoi	Naturalis:Icht:629	BIFA159-11
Melanotaeniidae	Melanotaenia parva	Indonesia:Papua Barat:Kurumoi	Naturalis:Icht:628	BIFA158-11
Melanotaeniidae	Melanotaenia parva	Indonesia:Papua Barat:Kurumoi	MNHN:Icht:627	BIFA157-11
Melanotaeniidae	Melanotaenia parva	Indonesia:Papua Barat:Kurumoi	MNHN:Icht:626	BIFA156-11
Melanotaeniidae	Melanotaenia parva	Indonesia:Papua Barat:Kurumoi	MZB:Icht:624	BIFA155-11
Melanotaeniidae	Melanotaenia parva	Indonesia:Papua Barat:Kurumoi	MZB:Icht:623	BIFA154-11
Melanotaeniidae	Melanotaenia pierucciae	Indonesia:Papua Barat:Lake Kamaka	IRD:Icht:1310	BIFA345-11
Melanotaeniidae	Melanotaenia pierucciae	Indonesia:Papua Barat:Lake Kamaka	IRD:Icht:1309	BIFA344-11
Melanotaeniidae	Melanotaenia pierucciae	Indonesia:Papua Barat:Lake Kamaka	IRD:Icht:1311	BIFA341-11
Melanotaeniidae	Melanotaenia pierucciae	Indonesia:Papua Barat:Lake Kamaka	IRD:Icht:1307	BIFA340-11
Melanotaeniidae	Melanotaenia pierucciae	Indonesia:Papua Barat:Lake Kamaka	IRD:Icht:1306	BIFA338-11
Melanotaeniidae	Melanotaenia pierucciae	Indonesia:Papua Barat:Lake Kamaka	IRD:Icht:1308	BIFA337-11
Melanotaeniidae	Melanotaenia praecox	Indonesia:Papua:Dabra	IRD:Icht:Praecox Strain	BIFA244-11
Melanotaeniidae	Melanotaenia rubripinnis	Indonesia:Papua:Wapoga	IRD:Icht:1285	BIFA263-11
Melanotaeniidae	Melanotaenia rubripinnis	Indonesia:Papua:Wapoga	IRD:Icht:1284	BIFA258-11
Melanotaeniidae	Melanotaenia rubripinnis	Indonesia:Papua:Wapoga	IRD:Icht:1283	BIFA256-11
Melanotaeniidae	Melanotaenia salawati	Indonesia:Papua Barat:Batanta	Naturalis:Icht:886	BIFA086-11
Melanotaeniidae	Melanotaenia salawati	Indonesia:Papua Barat:Salawati	Naturalis:Icht:885	BIFA085-11
Melanotaeniidae	Melanotaenia salawati	Indonesia:Papua Barat:Salawati	MNHN:Icht:884	BIFA084-11
Melanotaeniidae	Melanotaenia salawati	Indonesia:Papua Barat:Salawati	MNHN:Icht:883	BIFA083-11
Melanotaeniidae	Melanotaenia salawati	Indonesia:Papua Barat:Salawati	MZB:Icht:882	BIFA082-11
Melanotaeniidae	Melanotaenia salawati	Indonesia:Papua Barat:Salawati	MZB:Icht:881	BIFA081-11
Melanotaeniidae	Melanotaenia sexlineata	Papua New Guinea:Western:Kiunga	IRD:Icht:30A	BIFA273-11
Melanotaeniidae	Melanotaenia sexlineata	Papua New Guinea:Western:Kiunga	IRD:Icht:9A	BIFA272-11
Melanotaeniidae	Melanotaenia sp. 1	Indonesia:Papua Barat:Klasio	IRD:Icht:167	BIFA006-11
Melanotaeniidae	Melanotaenia sp. 1	Indonesia:Papua Barat:Klasio	IRD:Icht:166	BIFA005-11
Melanotaeniidae	Melanotaenia sp. 1	Indonesia:Papua Barat:Klasio	IRD:Icht:165	BIFA004-11
Melanotaeniidae	Melanotaenia sp. 1	Indonesia:Papua Barat:Klasio	IRD:Icht:164	BIFA003-11
Melanotaeniidae	Melanotaenia sp. 1	Indonesia:Papua Barat:Klasio	IRD:Icht:162	BIFA002-11
Melanotaeniidae	Melanotaenia sp. 1	Indonesia:Papua Barat:Klasio	IRD:Icht:161	BIFA001-11
Melanotaeniidae	Melanotaenia sp. 10	Indonesia:Papua Barat:Sewiki	IRD:Icht:1483	BIFA186-11
Melanotaeniidae	Melanotaenia sp. 10	Indonesia:Papua Barat:Sewiki	IRD:Icht:1482	BIFA185-11
Melanotaeniidae	Melanotaenia sp. 10	Indonesia:Papua Barat:Sewiki	IRD:Icht:1481	BIFA184-11
Melanotaeniidae	Melanotaenia sp. 10	Indonesia:Papua Barat:Sewiki	IRD:Icht:1480	BIFA183-11
Melanotaeniidae	Melanotaenia sp. 10	Indonesia:Papua Barat:Sewiki	IRD:Icht:1479	BIFA182-11
Melanotaeniidae	Melanotaenia sp. 10	Indonesia:Papua Barat:Sewiki	IRD:Icht:1478	BIFA181-11
Melanotaeniidae	Melanotaenia sp. 12	Indonesia:Papua Barat:Suswa	IRD:Icht:38A	BIFA015-11
Melanotaeniidae	Melanotaenia sp. 12	Indonesia:Papua Barat:Suswa	IRD:Icht:3A	BIFA014-11
Melanotaeniidae	Melanotaenia sp. 13	Indonesia:Maluku:Ngadamdi	IRD:Icht:4A	BIFA332-11
Melanotaeniidae	Melanotaenia sp. 14	Indonesia:Maluku:Trangan	IRD:Icht:5A	BIFA334-11
Melanotaeniidae	Melanotaenia sp. 15	Indonesia:Papua Barat:Lake Kamaka	IRD:Icht:1305	BIFA336-11
Melanotaeniidae	Melanotaenia sp. 2	Indonesia:Papua Barat:Klahfot	IRD:Icht:122	BIFA013-11
Melanotaeniidae	Melanotaenia sp. 2	Indonesia:Papua Barat:Klahfot	IRD:Icht:121	BIFA012-11
Melanotaeniidae	Melanotaenia sp. 3	Indonesia:Papua Barat:Sawiat	IRD:Icht:397	BIFA020-11
Melanotaeniidae	Melanotaenia sp. 3	Indonesia:Papua Barat:Sawiat	IRD:Icht:396	BIFA019-11
Melanotaeniidae	Melanotaenia sp. 3	Indonesia:Papua Barat:Sawiat	IRD:Icht:395	BIFA018-11
Melanotaeniidae	Melanotaenia sp. 3	Indonesia:Papua Barat:Sawiat	IRD:Icht:393	BIFA017-11
Melanotaeniidae	Melanotaenia sp. 3	Indonesia:Papua Barat:Sawiat	IRD:Icht:392	BIFA016-11
Melanotaeniidae	Melanotaenia sp. 4	Indonesia:Papua Barat:Waren	IRD:Icht:207	BIFA044-11
Melanotaeniidae	Melanotaenia sp. 4	Indonesia:Papua Barat:Waren	IRD:Icht:206	BIFA043-11
Melanotaeniidae	Melanotaenia sp. 4	Indonesia:Papua Barat:Waren	IRD:Icht:205	BIFA042-11
Melanotaeniidae	Melanotaenia sp. 4	Indonesia:Papua Barat:Waren	IRD:Icht:204	BIFA041-11
Melanotaeniidae	Melanotaenia sp. 4	Indonesia:Papua Barat:Waren	IRD:Icht:202	BIFA040-11
Melanotaeniidae	Melanotaenia sp. 4	Indonesia:Papua Barat:Waren	IRD:Icht:201	BIFA039-11
Melanotaeniidae	Melanotaenia sp. 5	Indonesia:Papua Barat:Keyen	IRD:Icht:811	BIFA056-11
Melanotaeniidae	Melanotaenia sp. 5	Indonesia:Papua Barat:Keyen	IRD:Icht:810	BIFA055-11
Melanotaeniidae	Melanotaenia sp. 5	Indonesia:Papua Barat:Keyen	IRD:Icht:809	BIFA054-11
Melanotaeniidae	Melanotaenia sp. 5	Indonesia:Papua Barat:Keyen	IRD:Icht:808	BIFA053-11
Melanotaeniidae	Melanotaenia sp. 5	Indonesia:Papua Barat:Keyen	IRD:Icht:807	BIFA052-11
Melanotaeniidae	Melanotaenia sp. 5	Indonesia:Papua Barat:Keyen	IRD:Icht:800	BIFA051-11
Melanotaeniidae	Melanotaenia sp. 5	Indonesia:Papua Barat:Sembra	IRD:Icht:823	BIFA050-11
Melanotaeniidae	Melanotaenia sp. 5	Indonesia:Papua Barat:Sembra	IRD:Icht:822	BIFA049-11
Melanotaeniidae	Melanotaenia sp. 5	Indonesia:Papua Barat:Sembra	IRD:Icht:821	BIFA048-11
Melanotaeniidae	Melanotaenia sp. 5	Indonesia:Papua Barat:Sembra	IRD:Icht:820	BIFA047-11
Melanotaeniidae	Melanotaenia sp. 5	Indonesia:Papua Barat:Sembra	IRD:Icht:819	BIFA046-11
Melanotaeniidae	Melanotaenia sp. 5	Indonesia:Papua Barat:Sembra	IRD:Icht:818	BIFA045-11
Melanotaeniidae	Melanotaenia sp. 6	Indonesia:Papua Barat:Bintuni	IRD:Icht:621	BIFA120-11
Melanotaeniidae	Melanotaenia sp. 6	Indonesia:Papua Barat:Bintuni	IRD:Icht:620	BIFA119-11
Melanotaeniidae	Melanotaenia sp. 6	Indonesia:Papua Barat:Bintuni	IRD:Icht:585	BIFA118-11
Melanotaeniidae	Melanotaenia sp. 6	Indonesia:Papua Barat:Bintuni	IRD:Icht:584	BIFA117-11
Melanotaeniidae	Melanotaenia sp. 6	Indonesia:Papua Barat:Bintuni	IRD:Icht:583	BIFA116-11
Melanotaeniidae	Melanotaenia sp. 6	Indonesia:Papua Barat:Bintuni	IRD:Icht:582	BIFA115-11
Melanotaeniidae	Melanotaenia sp. 7	Indonesia:Papua Barat:Gebiasi	IRD:Icht:1455	BIFA169-11
Melanotaeniidae	Melanotaenia sp. 7	Indonesia:Papua Barat:Gebiasi	IRD:Icht:1454	BIFA168-11
Melanotaeniidae	Melanotaenia sp. 7	Indonesia:Papua Barat:Gebiasi	IRD:Icht:1453	BIFA167-11
Melanotaeniidae	Melanotaenia sp. 7	Indonesia:Papua Barat:Gebiasi	IRD:Icht:1452	BIFA166-11
Melanotaeniidae	Melanotaenia sp. 7	Indonesia:Papua Barat:Gebiasi	IRD:Icht:1451	BIFA165-11
Melanotaeniidae	Melanotaenia sp. 7	Indonesia:Papua Barat:Gebiasi	IRD:Icht:1450	BIFA164-11
Melanotaeniidae	Melanotaenia sp. 8	Indonesia:Papua Barat:Egerwara	IRD:Icht:KM5	BIFA174-11
Melanotaeniidae	Melanotaenia sp. 8	Indonesia:Papua Barat:Egerwara	IRD:Icht:KM4	BIFA173-11
Melanotaeniidae	Melanotaenia sp. 8	Indonesia:Papua Barat:Egerwara	IRD:Icht:KM3	BIFA172-11
Melanotaeniidae	Melanotaenia sp. 8	Indonesia:Papua Barat:Egerwara	IRD:Icht:KM2	BIFA171-11
Melanotaeniidae	Melanotaenia sp. 8	Indonesia:Papua Barat:Egerwara	IRD:Icht:KM1	BIFA170-11
Melanotaeniidae	Melanotaenia sp. 9	Indonesia:Papua Barat:Wermura	IRD:Icht:1501	BIFA180-11
Melanotaeniidae	Melanotaenia sp. 9	Indonesia:Papua Barat:Wermura	IRD:Icht:1499	BIFA179-11
Melanotaeniidae	Melanotaenia sp. 9	Indonesia:Papua Barat:Wermura	IRD:Icht:1497	BIFA178-11
Melanotaeniidae	Melanotaenia sp. 9	Indonesia:Papua Barat:Wermura	IRD:Icht:1496	BIFA177-11
Melanotaeniidae	Melanotaenia sp. 9	Indonesia:Papua Barat:Wermura	IRD:Icht:1495	BIFA176-11
Melanotaeniidae	Melanotaenia sp. 9	Indonesia:Papua Barat:Wermura	IRD:Icht:1494	BIFA175-11
Melanotaeniidae	Melanotaenia splendida inornata	Australia:Northern Territory:Northern territory	IRD:Icht:26A	BIFA271-11
Melanotaeniidae	Melanotaenia splendida rubrostriata	Indonesia:Papua:Soba	IRD:Icht:16A	BIFA278-11
Melanotaeniidae	Melanotaenia synergos	Indonesia:Papua Barat:Batanta	IRD:Icht:55	BIFA204-11
Melanotaeniidae	Melanotaenia synergos	Indonesia:Papua Barat:Batanta	IRD:Icht:53	BIFA203-11
Melanotaeniidae	Melanotaenia synergos	Indonesia:Papua Barat:Batanta	IRD:Icht:52	BIFA202-11
Melanotaeniidae	Melanotaenia synergos	Indonesia:Papua Barat:Batanta	IRD:Icht:48	BIFA201-11
Melanotaeniidae	Melanotaenia synergos	Indonesia:Papua Barat:Batanta	IRD:Icht:47	BIFA200-11
Melanotaeniidae	Melanotaenia trifasciata	Australia:Northern Territory:Northern territory	IRD:Icht:22A	BIFA330-11
Melanotaeniidae	Melanotaenia trifasciata	Australia:Northern Territory:Northern territory	IRD:Icht:21A	BIFA329-11
Melanotaeniidae	Melanotaenia trifasciata	Australia:Northern Territory:Northern territory	IRD:Icht:23A	BIFA328-11
Melanotaeniidae	Melanotaenia trifasciata	Australia:Northern Territory:Northern territory	IRD:Icht:20A	BIFA327-11
Melanotaeniidae	Melanotaenia vanheurni	Indonesia:Papua:Mamberamo Tengah-Timur	IRD:Icht:X39B	BIFA230-11
